# Supplementary material for: Role of A-Kinase anchor protein (AKAP4) in growth and survival of ovarian cancer cells
Source: PubMed Central journal article supplement (PMC5581097; doi:10.18632/oncotarget.18163), 2017-05-24
Supplement: oncotarget-08-53124-s001.pdf [file oncotarget-08-53124-s001.pdf]

## Role of A-Kinase anchor protein (AKAP4) in growth and survival of ovarian cancer cells

### Supplementary Materials

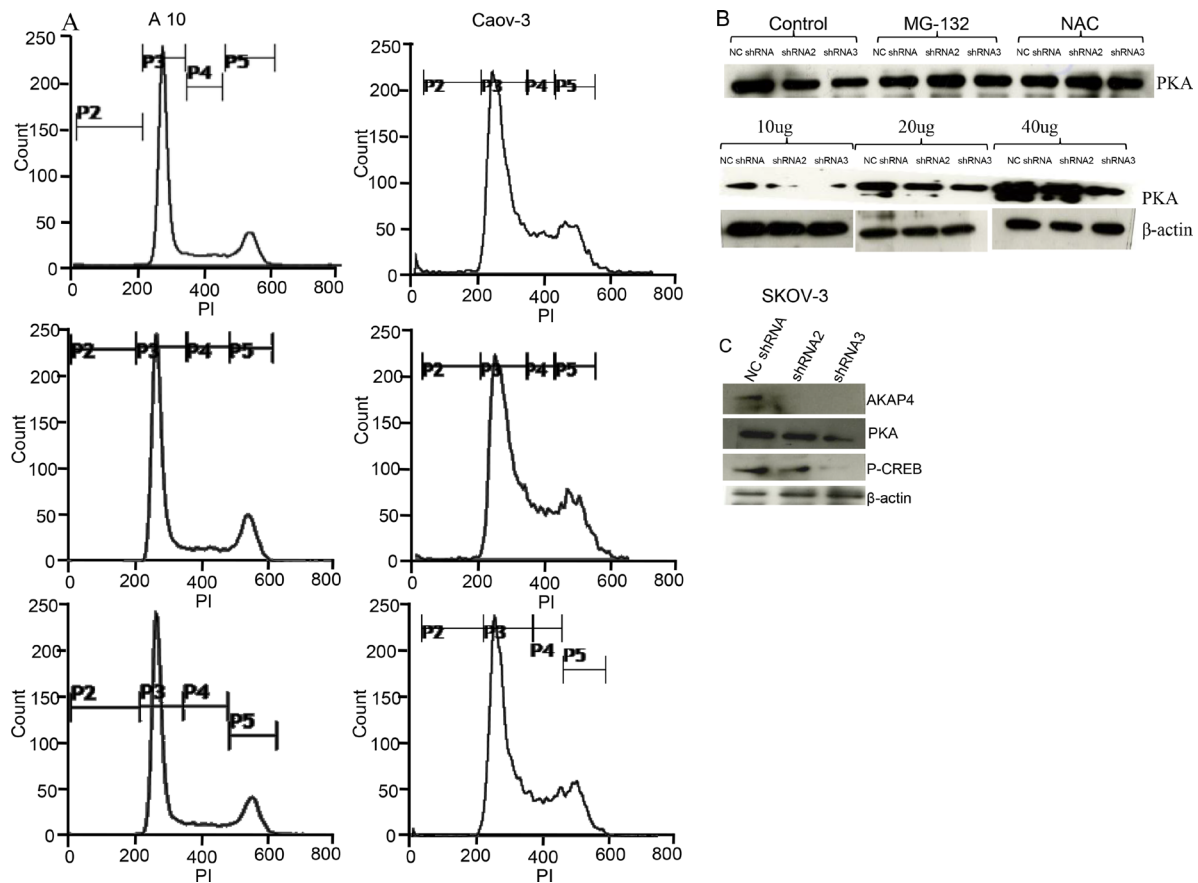

**Supplementary Figure 1:** (A) Histogram analysis after PI staining shows cell cycle rescue after NAC treatment in A10 and Caov-3 cells at 48 hr. (B) Western blot shows PKA expression after various treatments (shRNA, shRNA+MG-132 and shRNA+NAC) and PKA expression at different concentration of cell lysate (10  $\mu$ g, 20  $\mu$ g and 40  $\mu$ g) in Caov-3 at 48 hr. (C) Western blot shows downregulation of AKAP4, PKA and p-CREB in SKOV-3 cells.  $\beta$ -actin serves as loading control. The data shown as mean  $\pm$  standard error of the mean (SEM) of three independent experiments. \* $P < 0.05$ ; \*\* $P < 0.01$ .

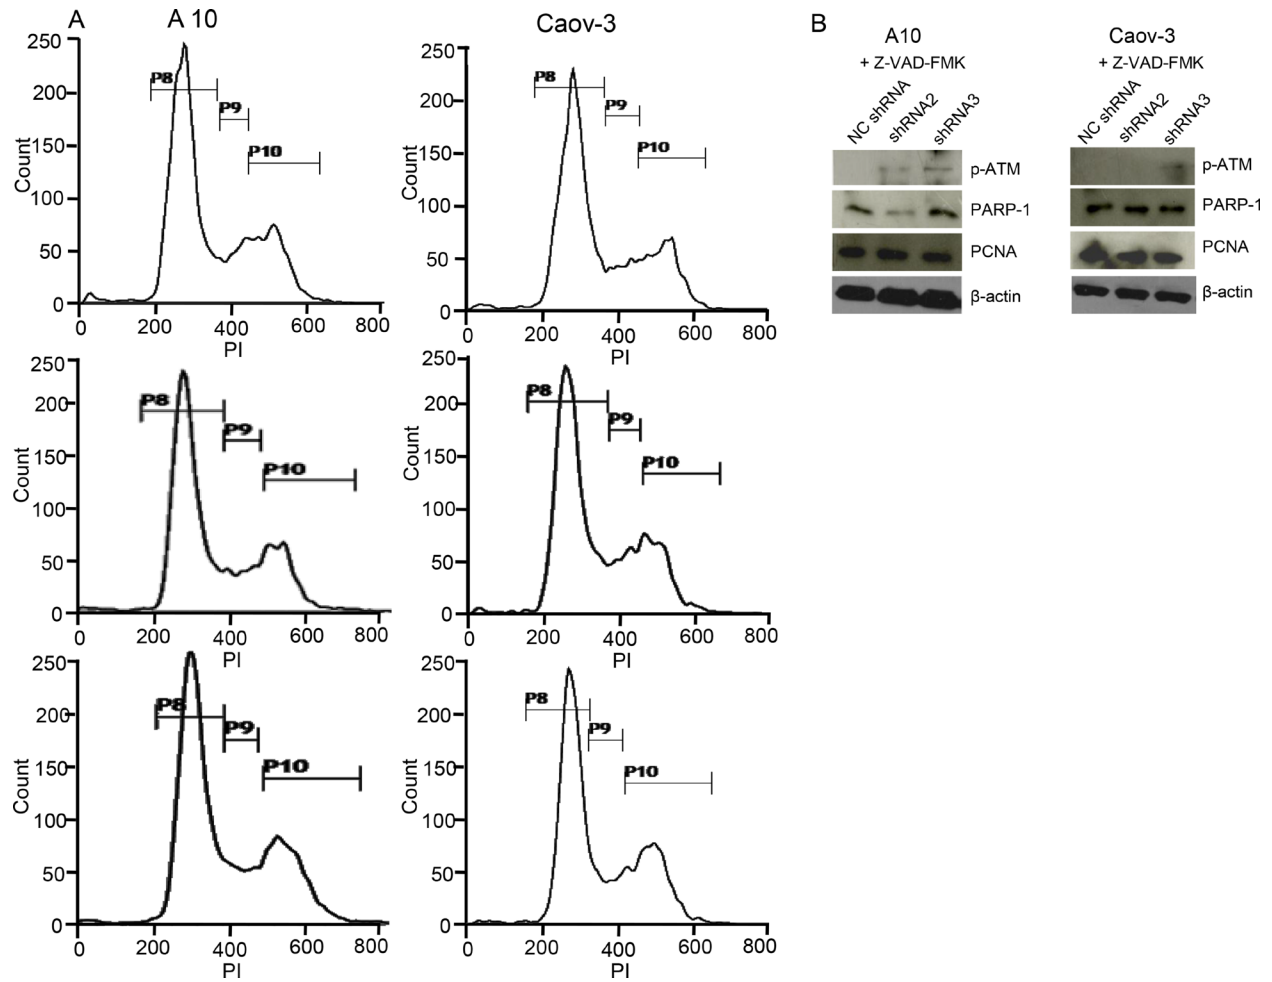

**Supplementary Figure 2:** (A) Histogram analysis after PI staining shows cell cycle rescue after caspase inhibitor (Z-VAD-FMK, 40  $\mu$ m) pre-treatment in A10 and Caov-3 cells at 48 hr. (B) Western blot shows expression of PCNA, PARP1 and p-ATM after caspase inhibition.  $\beta$ -actin serves as loading control.
